# Supplementary material
Source: PubMed Central journal article supplement (PMC4607747)

Supplementary Figure 1.

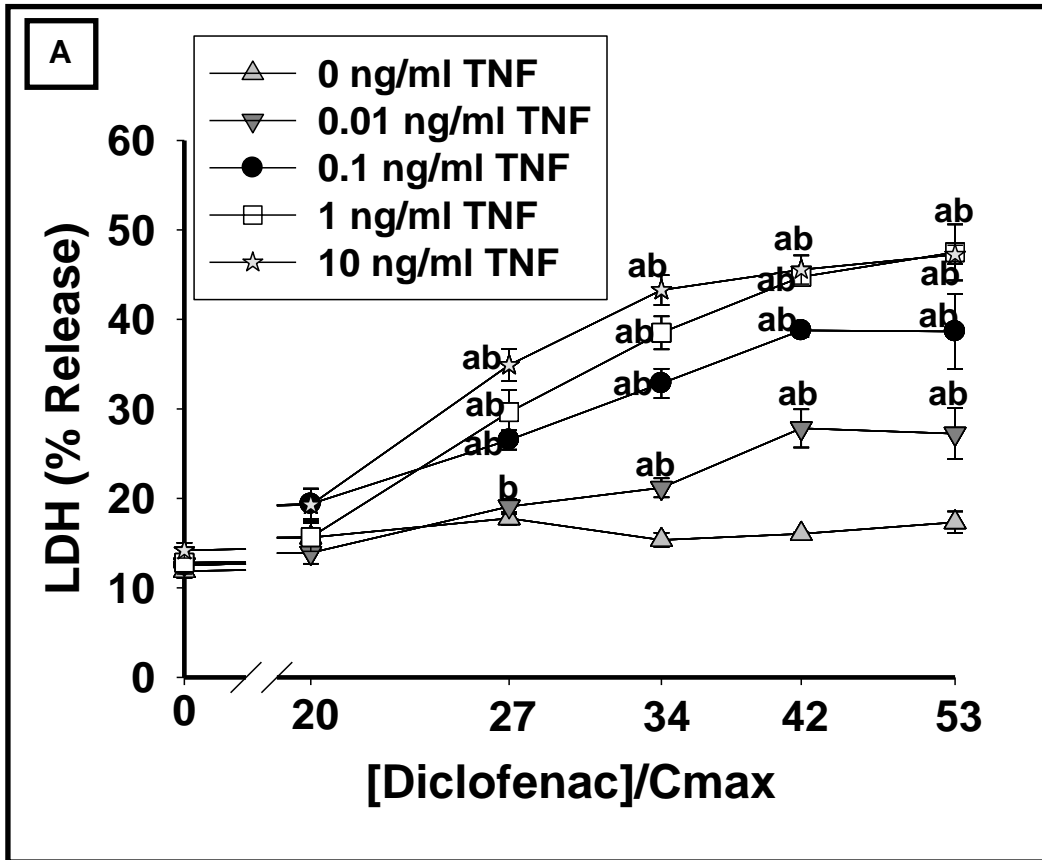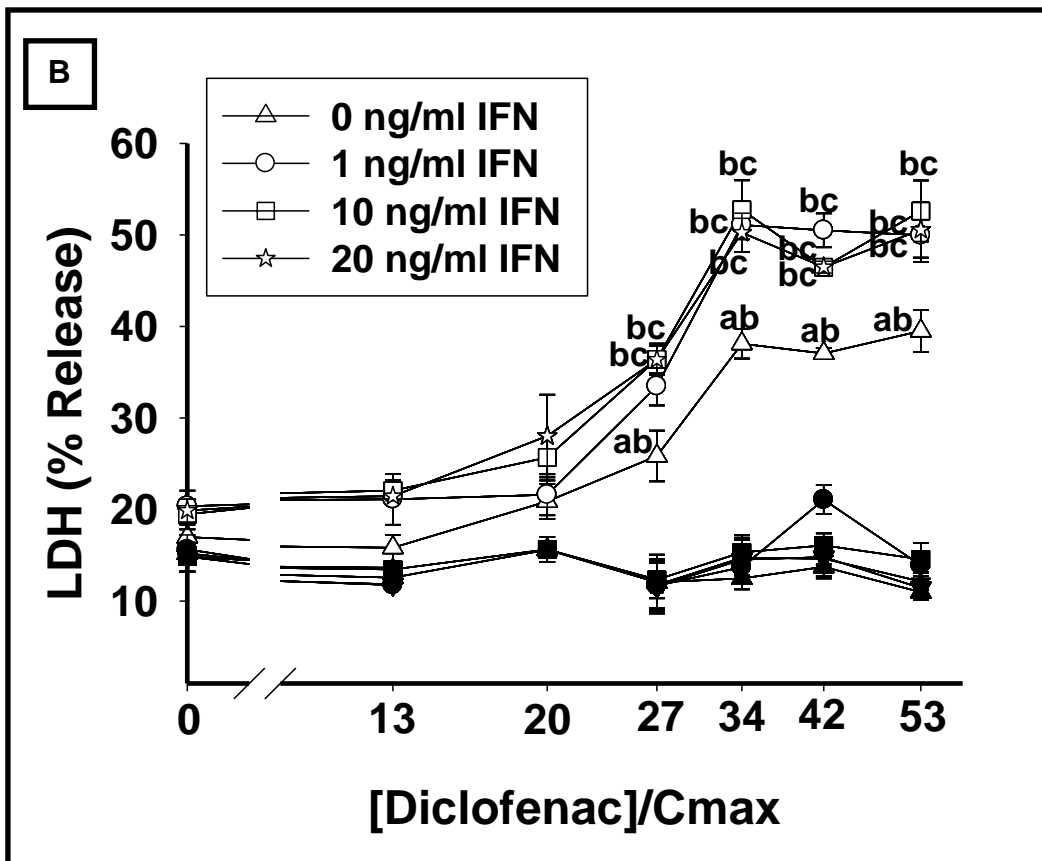

Supplementary Figure 2.

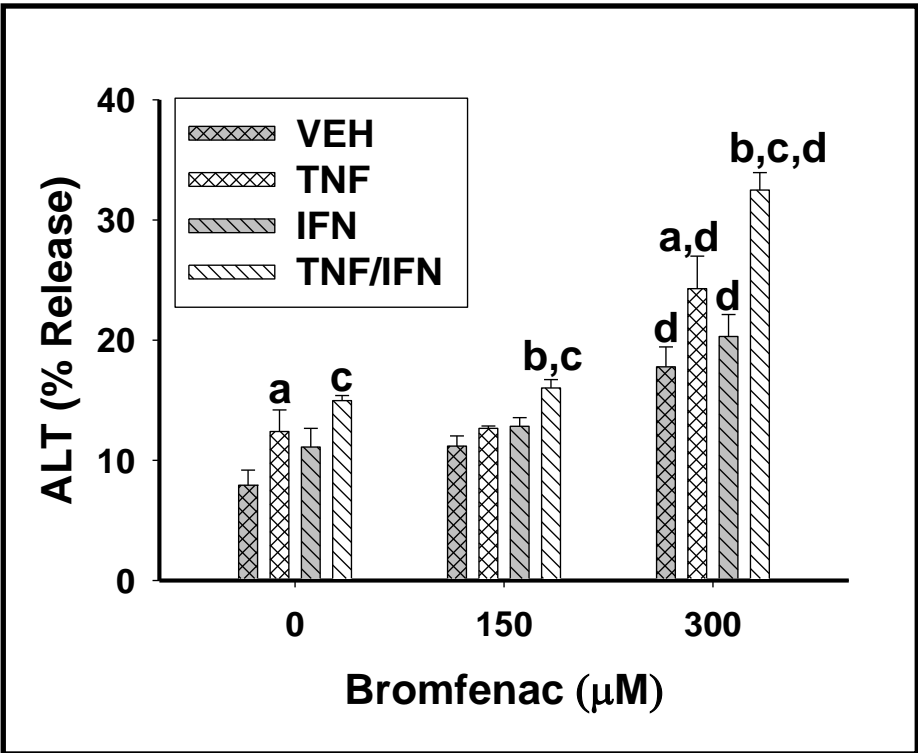

Supplementary Figure 3.

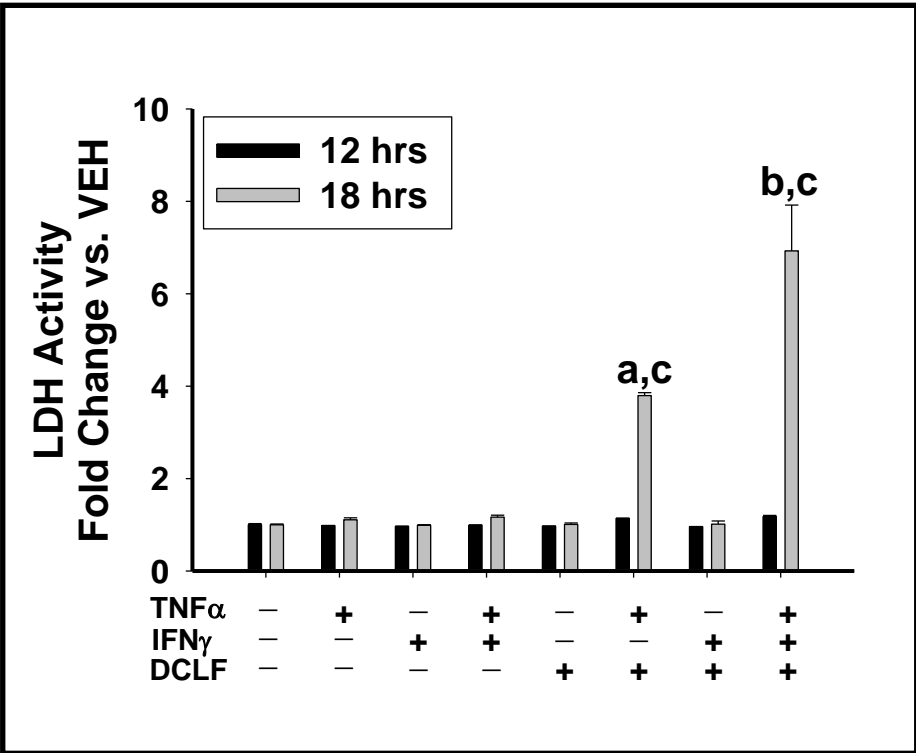

Supplementary Figure 4.

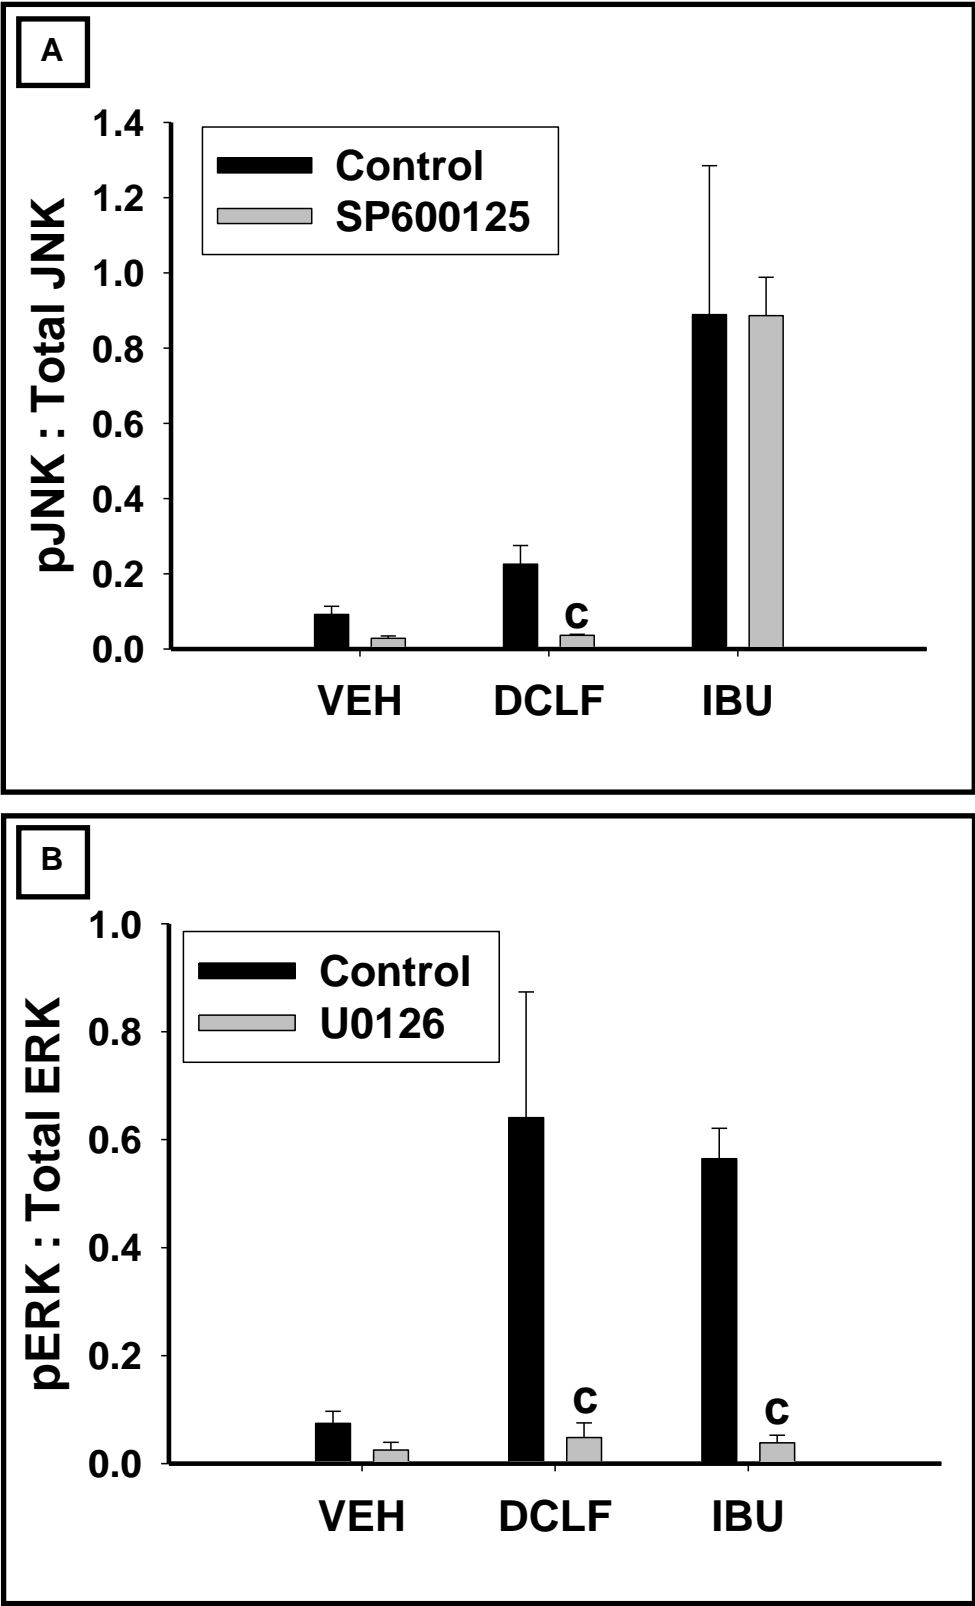

Supplement: supp_kfv091_toxsci-15-0026-File002.pdf [file supp_kfv091_toxsci-15-0026-File002.pdf]
